# Supplementary material for: Tracking daily NO x emissions from an urban agglomeration based on TROPOMI NO 2 and a local ensemble transform Kalman filter
Source: Copernicus journal article supplement (doi:10.5194/egusphere-2024-2996), 2024-11-25
Supplement: Supplementary file 1 [file egusphere-2024-2996-supplement.pdf]

*Supplement of*

# **Tracking daily NO<sub>x</sub> emissions from an urban agglomeration based on TROPOMI NO<sub>2</sub> and a local ensemble transform Kalman filter**

Yawen Kong<sup>1,2</sup>, Bo Zheng<sup>3,4</sup>, Yuxi Liu<sup>5</sup>

5 <sup>1</sup>Ministry of Education Key Laboratory for Earth System Modeling, Department of Earth System Science, Tsinghua University, Beijing 100084, China

<sup>2</sup>State Key Laboratory of Remote Sensing Science, Aerospace Information Research Institute, Chinese Academy of Sciences, Beijing 100101, China

10 <sup>3</sup>Institute of Environment and Ecology, Tsinghua Shenzhen International Graduate School, Tsinghua University, Shenzhen 518055, China

<sup>4</sup>State Environmental Protection Key Laboratory of Sources and Control of Air Pollution Complex, Beijing 100084, China

<sup>5</sup>State Environmental Protection Key Laboratory of Environmental Pollution and Greenhouse Gases Co-control, Chinese Academy of Environmental Planning, Beijing 100041, China

15 *Correspondence to:* Yawen Kong (kongyw@aircas.ac.cn)

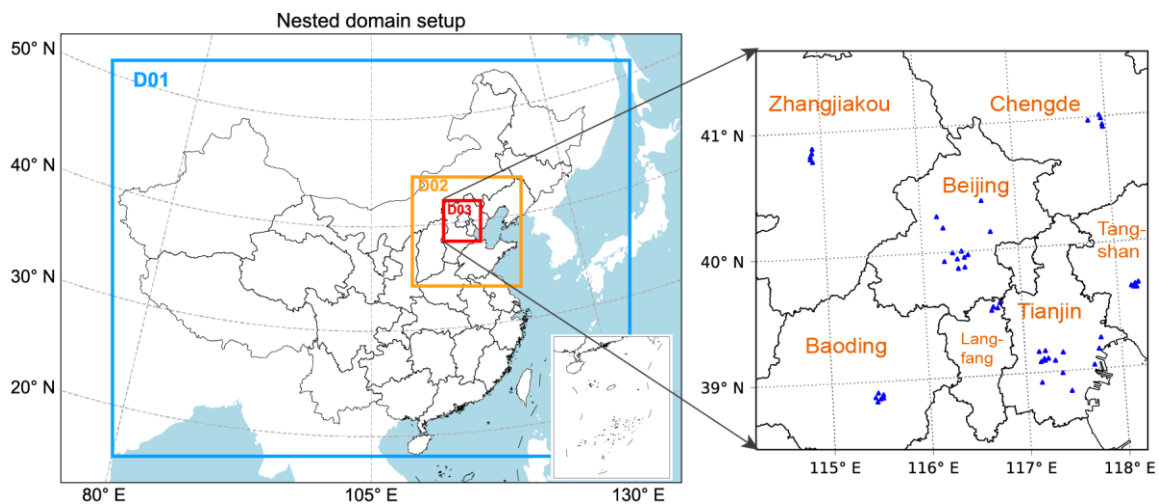

**Figure S1. The nested domains for CMAQ modeling and inversion.** The domain D03 is the area for  $\text{NO}_x$  emission inversion that covers Beijing and its surroundings. The blue triangles in the domain D03 are the locations of the air quality monitoring stations used for evaluation in this study.

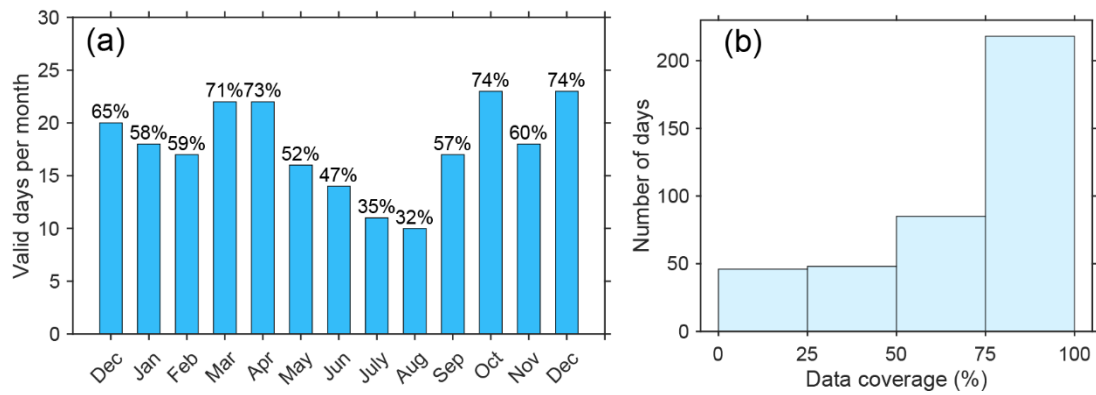

**Figure S2. Number of days with TROPOMI coverage exceeding 70% per month (a), and the TROPOMI data coverage histogram (b).**

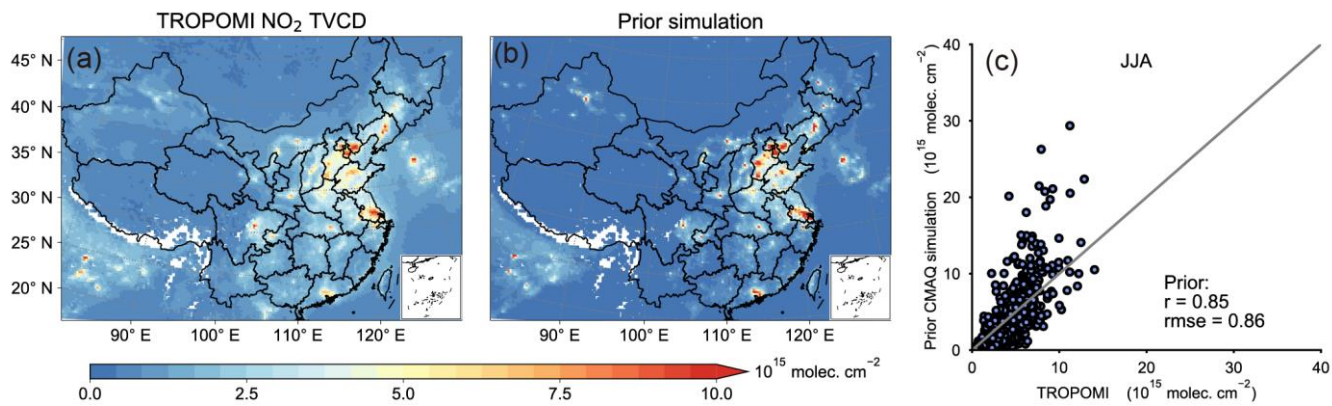

**Figure S3. Comparison between TROPOMI NO<sub>2</sub> TVCD and CMAQ-modeled NO<sub>2</sub> TVCDs driven by the prior emissions in the D01 region at 27 km scale during the summer (June-July-August). The third column is the scatter plot for comparison at grid scales.**

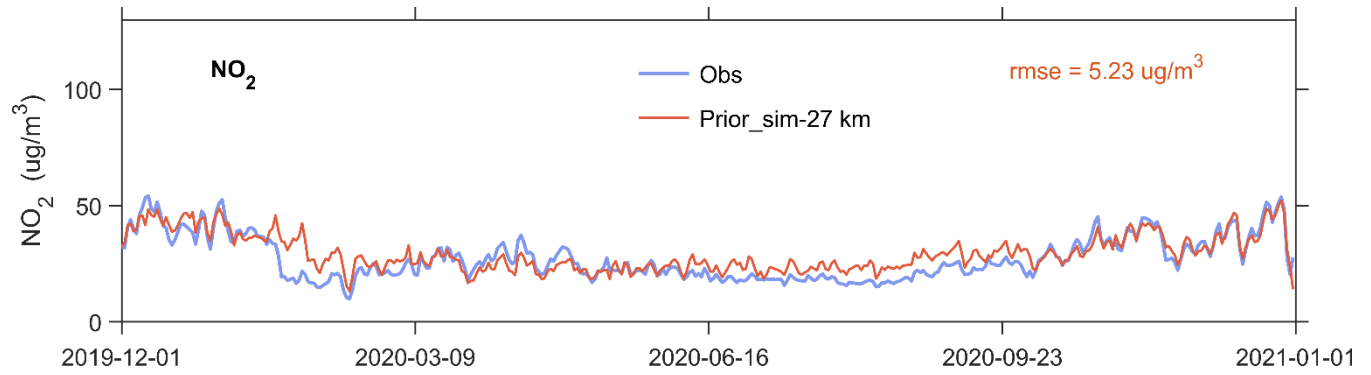

**Figure S4. Comparison of the ground-based daily NO<sub>2</sub> observations with the CMAQ simulations in the domain D01 at the 27 km scale utilizing the bottom-up NO<sub>x</sub> emissions as the model input.**

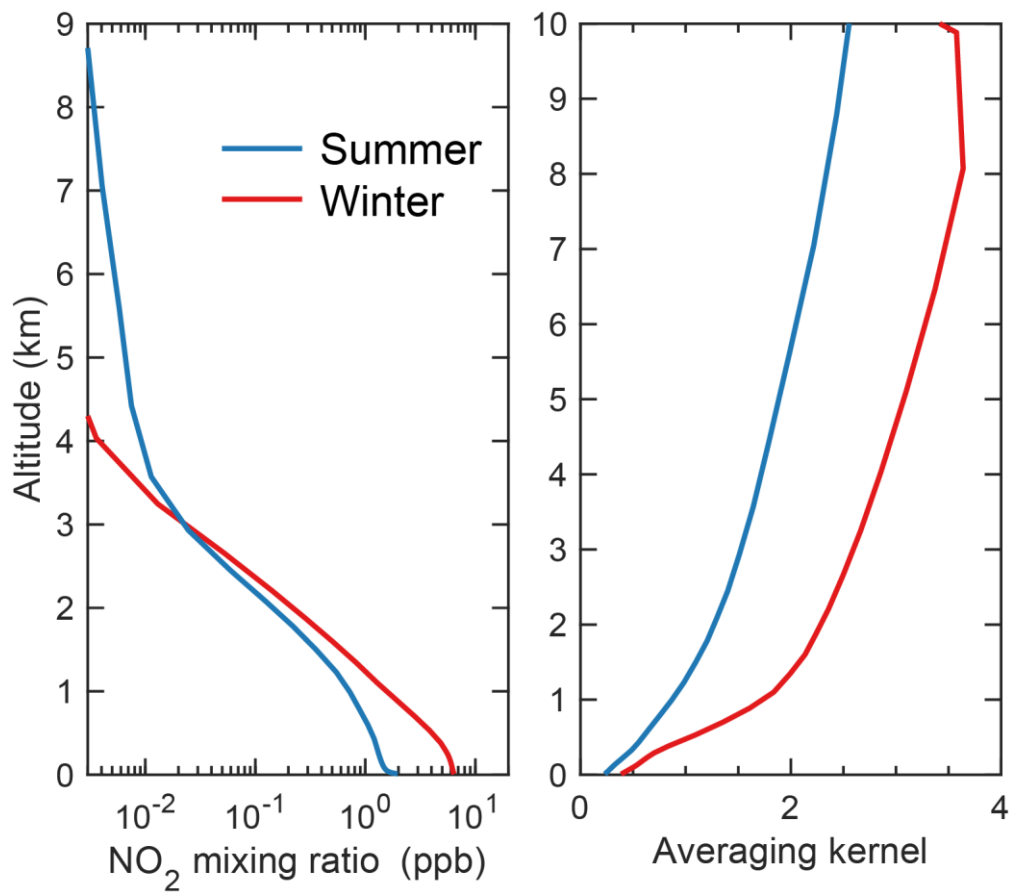

35

Figure S5. NO<sub>2</sub> profiles (a) and AK profiles (b) in Summer and Winter averaged from the domain D03.

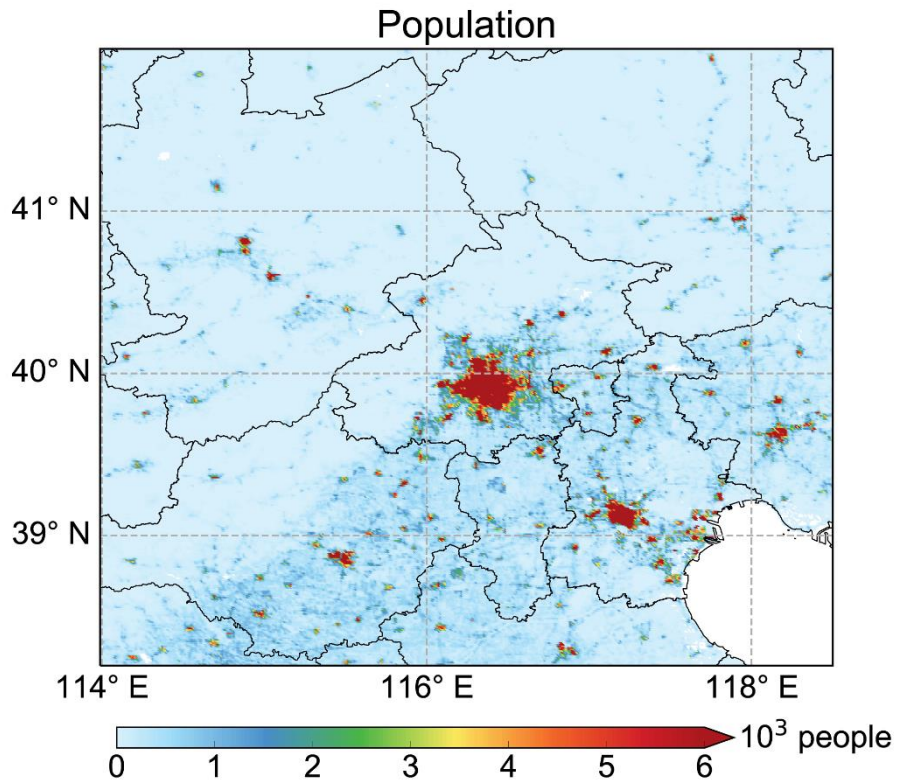

40 **Figure S6. Spatial map of the population in Beijing and surrounding areas. The population data are obtained from WorldPop (<https://www.worldpop.org/>).**

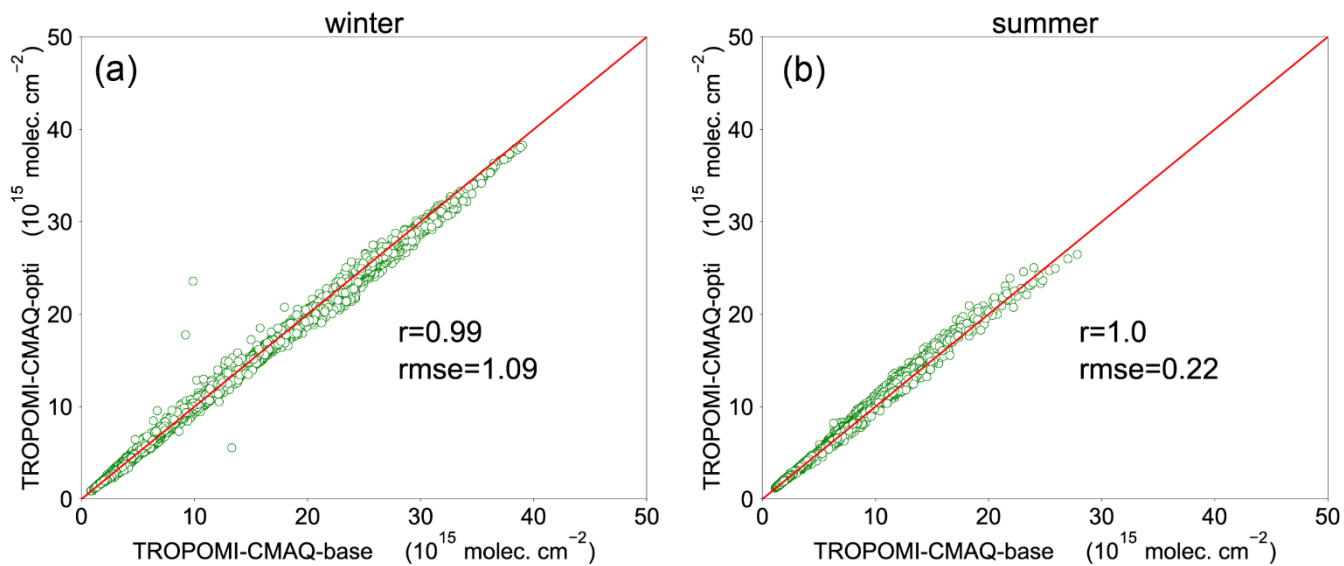

45 **Figure S7. Comparison of the new satellite products calculated based on the CMAQ profiles simulated by the prior (X-axis) and posterior (Y-axis) emissions in winter (a) and summer (b).**
